# Supplementary material
Source: publisher figshare collection journal article supplement (https://sage.figshare.com/ndownloader/files/15510572)
Supplement: Supplementary file 1 [file 15510572]

# SUPPLEMENTARY FILE 3

## CLARITHROMYCIN

### Clarithromycin dosage and its calculations for 0 to 1 month neonate

| Infections                                                                                     | Age (weight)             | Dosage form | Dose           | Strength    | Dosing frequency | Duration of therapy | Dose/day & Dose/day × No. of days                        | Quantity of dosage form to be used | Calculation                                                                                                   | Result        |
|------------------------------------------------------------------------------------------------|--------------------------|-------------|----------------|-------------|------------------|---------------------|----------------------------------------------------------|------------------------------------|---------------------------------------------------------------------------------------------------------------|---------------|
| Pneumonia, sinusitis, mild to moderate skin and soft tissue infection, prevention of pertussis | 0–1 month (3.5 to 4.3kg) | Drops       | 26.25–32.25 mg | 125 mg/5 ml | b.i.d            | 7 days              | 52.5–64.50 mg<br>52.5–64.50 mg × 7 = 367.5–451.5 mg      | 14.7–8.06 ml                       | 10.3–6.94 ml extra in minimum available pack size of drops i.e. 25 ml.                                        | Inappropriate |
|                                                                                                |                          | Suspension  | 26.25–32.25 mg | 125 mg/5 ml | b.i.d            | 7 days              | 52.5–64.50 mg<br>52.5–64.50 mg × 7 = 367.5–451.5 mg      | 14.7–8.06 ml                       | 15.3–11.94 ml extra in minimum available pack size of suspension i.e. 30 ml.                                  | Inappropriate |
|                                                                                                |                          | IV Infusion | 26.2–32.5 mg   | 500 mg      | b.i.d            | 2-5 days            | 52.5–64.50 mg<br>52.5–64.50 mg × (2-5) =<br>105–322.5 mg | 4-10 vials                         | 473.75–467.75 mg extra per dose.<br>947.5–935.5 mg extra per day.<br>1871–4737.5 mg extra for whole duration. | Inappropriate |

**b.i.d:** Two times a day, **IV:** Intravenous

| Infections        | Age (weight)             | Dosage form | Dose           | Strength    | Dosing frequency | Duration of therapy | Dose/day & Dose/day × No. of days                    | Quantity of dosage form to be used | Calculation                                                                                                                                                                                                                                        | Result        |
|-------------------|--------------------------|-------------|----------------|-------------|------------------|---------------------|------------------------------------------------------|------------------------------------|----------------------------------------------------------------------------------------------------------------------------------------------------------------------------------------------------------------------------------------------------|---------------|
| Throat infections | 0–1 month (3.5 to 4.3kg) | Drops       | 26.25–32.25 mg | 125 mg/5 ml | b.i.d            | 10 days             | 52.5–4.50 mg<br>52.5–4.50 mg × 10 = 525–645 mg       | 21–25.8 ml                         | 4 ml extra in minimum available pack size of 25 ml for lowest quantity required. for higher quantity required, 0.8 ml less in minimum available pack size of drops i.e. 25 ml and 4.2 ml extra in maximum available pack size of drops i.e. 30 ml. | Inappropriate |
|                   |                          | Suspension  | 26.25–32.25 mg | 125 mg/5 ml | b.i.d            | 10 days             | 52.5–64.50 mg<br>52.5–64.50 mg × 10 = 525–645 mg     | 21–25.8 ml                         | 9–4.2 ml extra in minimum available pack size of suspension i.e. 30 ml.                                                                                                                                                                            | Inappropriate |
| Otitis media      | 0–1 month (3.5 to 4.3kg) | Drops       | 26.25–32.25 mg | 125 mg/5 ml | b.i.d            | 5 days              | 52.5–64.50 mg<br>52.5–64.50 mg × 5 = 262.5–322.5 mg  | 10.5–12.9 ml                       | 14.5–12.1 ml extra in minimum available pack size of drops i.e. 25 ml.                                                                                                                                                                             | Inappropriate |
|                   |                          | Suspension  | 26.25–32.25 mg | 125 mg/5 ml | b.i.d            | 5 days              | 52.5–64.50 mg,<br>52.5–64.50 mg × 5 = 262.5–322.5 mg | 10.5–12.9 ml                       | 19.5–17.1 ml extra in minimum available pack size of suspension i.e. 30 ml.                                                                                                                                                                        | Inappropriate |

**b.i.d:** Two times a day

### Clarithromycin dosage and its calculations for 1 month to 1 year children

| Infections                                                                                     | Age (weight)                 | Dosage form | Dose                       | Strength     | Dosing frequency | Duration of therapy | Dose/day & Dose/day × No. of days                        | Quantity of dosage form to be used | Calculation                                                                                                                                                                                                                                          | Result        |
|------------------------------------------------------------------------------------------------|------------------------------|-------------|----------------------------|--------------|------------------|---------------------|----------------------------------------------------------|------------------------------------|------------------------------------------------------------------------------------------------------------------------------------------------------------------------------------------------------------------------------------------------------|---------------|
| Pneumonia, sinusitis, mild to moderate skin and soft tissue infection, prevention of pertussis | 1 to 6 months (4.3 to 7.7kg) | Suspension  | 32.25–57.75 mg             | 125 mg /5 ml | b.i.d            | 7 days              | 64.50–115.5 mg<br>64.50–115.5 mg × 7 =<br>451.5–808.5 mg | 18.06–32.34 ml                     | 11.94 ml extra in minimum available pack i.e. 30 ml for lowest quantity required.<br>For higher quantity required 2.34 ml less in minimum available pack size i.e. 30 ml.<br>17.66 ml extra in maximum available pack size of suspension i.e. 50 ml. | Inappropriate |
|                                                                                                |                              | Suspension  | 32.25–57.75 mg             | 250 mg /5 ml | b.i.d            | 7 days              | 64.50–115.5 mg<br>64.50–115.5 mg × 7 =<br>451.5–808.5 mg | 8.31–16.17 ml                      | 61.69–53.83 ml extra in available pack size of suspension i.e. 70 ml.                                                                                                                                                                                | Inappropriate |
|                                                                                                |                              | IV infusion | 7.5 mg/kg (32.25–57.75 mg) | 500 mg       | b.i.d            | 2–5 days            | 64.50–115.5 mg<br>64.50–115.5 mg × (2-5) = 129–577.5 mg  | 4–10 vials                         | 467.75–442.25 mg extra per dose.<br>935.5–884.5 mg extra per day.<br>1769–4677.5 mg extra for whole duration.                                                                                                                                        | Inappropriate |

**b.i.d:** Two times a day, **IV:** Intravenous

| Infections        | Age (weight)                 | Dosage form | Dose           | Strength     | Dosing frequency | Duration of therapy | Dose/day &Dose/day × No. of days                         | Quantity of dosage form to be used | Calculation                                                                                                                                                                                                                                 | Result        |
|-------------------|------------------------------|-------------|----------------|--------------|------------------|---------------------|----------------------------------------------------------|------------------------------------|---------------------------------------------------------------------------------------------------------------------------------------------------------------------------------------------------------------------------------------------|---------------|
| Otitis media      | 1 to 6 months (4.3 to 7.7kg) | Suspension  | 32.25–57.75 mg | 125 mg /5 ml | b.i.d            | 5 days              | 64.50–115.5 mg<br>64.50–115.5 mg × 5 =<br>322.5–577.5 mg | 12.9–23.1 ml                       | 17.1–6.9 ml extra in minimum available pack size i.e. 30 ml.                                                                                                                                                                                | Inappropriate |
|                   |                              | Suspension  | 32.25–57.75 mg | 250 mg /5 ml | b.i.d            | 5 days              | 64.50–115.5 mg<br>64.50–115.5 mg × 5 =<br>322.5–577.5 mg | 6.45–11.55 ml                      | 63.55–58.45 ml extra in available pack size i.e. 70 ml.                                                                                                                                                                                     | Inappropriate |
| Throat infections |                              | Suspension  | 32.25–57.75 mg | 125 mg /5 ml | b.i.d            | 10 days             | 64.50–115.5 mg<br>64.50–115.5 mg × 10 = 645–1155 mg      | 25.8–46.2 ml                       | 4.2 ml is extra in minimum available pack of 30 ml for lowest quantity required.<br>For highest quantity required, 16.2 ml less in minimum available pack size i.e. 30 ml.<br>3.8 ml extra in available pack size of suspension i.e. 50 ml. | Inappropriate |
|                   |                              | Suspension  | 32.25–57.75 mg | 250 mg /5 ml | b.i.d            | 10 days             | 64.50–115.5 mg<br>64.50–115.5 mg × 10 = 645–1155 mg      | 12.9–23.1 ml                       | 57.1–46.9 ml extra in available pack size of suspension i.e. 70 ml.                                                                                                                                                                         | Inappropriate |

**b.i.d:** Two times a day

| Infections                                                                                     | Age (weight)                  | Dosage form | Dose                    | Strength     | Dosing frequency | Duration of therapy | Dose/day &Dose/day × No. of days                  | Quantity of dosage form to be used | Calculation                                                                                                          | Result        |
|------------------------------------------------------------------------------------------------|-------------------------------|-------------|-------------------------|--------------|------------------|---------------------|---------------------------------------------------|------------------------------------|----------------------------------------------------------------------------------------------------------------------|---------------|
| Pneumonia, sinusitis, mild to moderate skin and soft tissue infection, prevention of pertussis | 6 to 12 months (7.7 to 10 kg) | Suspension  | 62.5 mg                 | 125 mg /5 ml | b.i.d            | 7 days              | 125 mg<br>125 mg<br>× 7 = 875 mg                  | 35 ml                              | 5 ml less in minimum available pack size i.e. 30 ml.<br>15 ml extra in available pack size of suspension i.e. 50 ml. | Inappropriate |
|                                                                                                |                               | Suspension  | 62.5 mg                 | 250 mg /5 ml | b.i.d            | 7 days              | 125 mg<br>125 mg<br>× 7 = 875 mg                  | 17.5 ml                            | 52.5 ml extra in available pack size of suspension i.e. 70 ml.                                                       | Inappropriate |
|                                                                                                |                               | IV Infusion | 7.5 mg/kg (57.75–75 mg) | 500 mg       | b.i.d            | 2-5 days            | 115.5–125 mg<br>115.5–125 mg × (2–5) = 231–625 mg | 4-10 vials                         | 442.25–425 mg extra per dose.<br>884.5–850 mg extra per day.<br>1700–4422.5 mg extra for whole duration.             | Inappropriate |
| Otitis media                                                                                   |                               | Suspension  | 62.5 mg                 | 125 mg /5 ml | b.i.d            | 5 days              | 125 mg<br>125 mg<br>× 5 = 675 mg                  | 27 ml                              | 3 ml extra in minimum available pack size i.e. 30 ml.                                                                | Inappropriate |
|                                                                                                |                               | Suspension  | 62.5 mg                 | 250 mg /5 ml | b.i.d            | 5 days              | 125 mg<br>125 mg<br>× 5 = 675 mg                  | 13.5 ml                            | 56.5 ml extra in available pack size of suspension i.e. 70 ml.                                                       | Inappropriate |

| Infections                                    | Age (weight)                  | Dosage form | Dose                   | Strength     | Dosing frequency | Duration of therapy | Dose/day &Dose/day × No. of days               | Quantity of dosage form to be used | Calculation                                                                                                                                                                                         | Result        |
|-----------------------------------------------|-------------------------------|-------------|------------------------|--------------|------------------|---------------------|------------------------------------------------|------------------------------------|-----------------------------------------------------------------------------------------------------------------------------------------------------------------------------------------------------|---------------|
| Throat infections                             | 6 to 12 months (7.7 to 10 kg) | Suspension  | 62.5 mg                | 125 mg /5 ml | b.i.d            | 10 days             | 125 mg<br>125 mg × 10 = 1250 mg                | 50 ml                              | Quantity is exactly equivalent to pack size i.e. 50 ml.                                                                                                                                             | Appropriate   |
|                                               |                               | Suspension  | 62.5 mg                | 250 mg /5 ml | b.i.d            | 10 days             | 125 mg<br>125 mg × 10 = 1250 mg                | 25 ml                              | 45 ml extra in available pack size of suspension i.e. 70 ml.                                                                                                                                        | Inappropriate |
| Lyme disease, Helicobacter pylori eradication |                               | Suspension  | 7.5 mg/kg (31.5–75 mg) | 125 mg /5 ml | b.i.d            | 14–21 days          | 63–150 mg<br>63–150 mg × (14–21) = 882–3150 mg | 35.28–126 ml                       | 34.72 ml lesser minimum available pack 30 ml for lowest quantity required. For highest quantity required, 4 ml extra in 1x70 ml and 1x60 ml pack sizes. 6 ml less in1x70 ml and 1x50 ml pack sizes. | Inappropriate |
|                                               |                               | Suspension  | 7.5 mg/kg (31.5–75 mg) | 250 mg /5 ml | b.i.d            | 14–21 days          | 63–150 mg<br>63–150 mg × (14-21) = 882–3150 mg | 17.64–63 ml                        | 52.36 ml extra in available pack of 70 ml for lowest quantity required. for highest required quantity, 7 ml extra in available pack size of 70 ml.                                                  | Inappropriate |

**b.i.d:** Two times a day, **IV:** Intravenous

### Clarithromycin dosage and its calculations for 1 to 2 years children

| Infections                                                                                     | Age (weight)              | Dosage form | Dose                   | Strength     | Dosing frequency | Duration of therapy | Dose/day & Dose/day × No. of days                   | Quantity of dosage form to be used | Calculation                                                                                                          | Result        |
|------------------------------------------------------------------------------------------------|---------------------------|-------------|------------------------|--------------|------------------|---------------------|-----------------------------------------------------|------------------------------------|----------------------------------------------------------------------------------------------------------------------|---------------|
| Pneumonia, sinusitis, mild to moderate skin and soft tissue infection, prevention of pertussis | 1 to 2 years (8 to 11 kg) | Suspension  | 62.5 mg                | 125 mg /5 ml | b.i.d            | 7 days              | 125 mg<br>125 mg<br>× 7 = 875 mg                    | 35 ml                              | 5 ml less in minimum available pack size i.e. 30 ml.<br>15 ml extra in available pack size of suspension i.e. 50 ml. | Inappropriate |
|                                                                                                |                           | Suspension  | 62.5 mg                | 250 mg /5 ml | b.i.d            | 7 days              | 125 mg<br>125 mg<br>× 7 = 875 mg                    | 17.5 ml                            | 52.5 ml extra in available pack size of suspension i.e. 70 ml.                                                       | Inappropriate |
|                                                                                                |                           | IV Infusion | 7.5 mg/kg (60–82.5 mg) | 500 mg       | b.i.d            | 2–5 days            | 120–165 mg<br>120–165 mg<br>× (2–5) =<br>240–825 mg | 4-10 vials                         | 440–417.5 mg extra per dose.<br>880–835 mg extra per day.<br>1670–4400 mg extra for whole duration.                  | Inappropriate |

**b.i.d:** Two times a day

| Infections        | Age (weight)              | Dosage form | Dose    | Strength     | Dosing frequency | Duration of therapy | Dose/day &Dose/day × No. of days   | Quantity of dosage form to be used | Calculation                                                    | Result        |
|-------------------|---------------------------|-------------|---------|--------------|------------------|---------------------|------------------------------------|------------------------------------|----------------------------------------------------------------|---------------|
| Otitis media      | 1 to 2 years (8 to 11 kg) | Suspension  | 62.5 mg | 125 mg /5 ml | b.i.d            | 5 days              | 125 mg<br>125 mg<br>× 5 = 675 mg   | 27 ml                              | 3 ml extra in minimum available pack size i.e. 30 ml.          | Inappropriate |
|                   |                           | Suspension  | 62.5 mg | 250 mg /5 ml | b.i.d            | 5 days              | 125 mg<br>125 mg<br>× 5 = 675 mg   | 13.5 ml                            | 56.5 ml extra in available pack size of suspension i.e. 70 ml. | Inappropriate |
| Throat infections |                           | Suspension  | 62.5 mg | 125 mg /5 ml | b.i.d            | 10 days             | 125 mg<br>125 mg<br>× 10 = 1250 mg | 50 ml                              | Quantity is exactly equivalent to pack size i.e. 50 ml.        | Appropriate   |
|                   |                           | Suspension  | 62.5 mg | 250 mg /5 ml | b.i.d            | 10 days             | 125 mg<br>125 mg<br>× 10 = 1250 mg | 25 ml                              | 45 ml extra in available pack size of suspension i.e. 70 ml    | Inappropriate |

**b.i.d:** Two times a day



| Infections                                           | Age (weight)              | Dosage form | Dose                   | Strength     | Dosing frequency | Duration of therapy | Dose/day & Dose/day × No. of days                 | Quantity of dosage form to be used | Calculation                                                                                                                                                                                                    | Result        |
|------------------------------------------------------|---------------------------|-------------|------------------------|--------------|------------------|---------------------|---------------------------------------------------|------------------------------------|----------------------------------------------------------------------------------------------------------------------------------------------------------------------------------------------------------------|---------------|
| Lyme disease, <i>Helicobacter pylori</i> eradication | 1 to 2 years (8 to 11 kg) | Suspension  | 7.5 mg/kg (60–82.5 mg) | 125 mg /5 ml | b.i.d            | 14–21 days          | 120–165 mg<br>120–165 mg × (14–21) = 1680–3465 mg | 67.2–138.6 ml                      | 2.8 ml extra in maximum available pack sizes of suspension i.e. 70 ml for lowest quantity required.<br>For highest quantity required, 1.4 ml extra in 2 maximum available pack sizes of suspension i.e. 70 ml. | Inappropriate |
|                                                      |                           | Suspension  | 7.5 mg/kg (60–82.5 mg) | 250 mg /5 ml | b.i.d            | 14–21 days          | 120–165 mg<br>120–165 mg × (14–21) = 1680–3465 mg | 33.6–69.3 ml                       | 36.4 ml extra in available pack sizes of suspension i.e. 70 ml for lowest quantity required.<br>for highest quantity required, 0.7 ml extra in available pack sizes of suspension i.e. 70 ml.                  | Inappropriate |

**b.i.d:** Two times a day

### Clarithromycin dosage and its calculations for 2 to 4 years children

| Infections                                                                                     | Age (weight)               | Dosage form | Dose                    | Strength     | Dosing frequency | Duration of therapy | Dose/day &Dose/day × No. of days                  | Quantity of dosage form to be used | Calculation                                                                                         | Result        |
|------------------------------------------------------------------------------------------------|----------------------------|-------------|-------------------------|--------------|------------------|---------------------|---------------------------------------------------|------------------------------------|-----------------------------------------------------------------------------------------------------|---------------|
| Pneumonia, sinusitis, mild to moderate skin and soft tissue infection, prevention of pertussis | 2 to 4 years (12 to 19 kg) | Suspension  | 125 mg /5 ml            | 125 mg /5 ml | b.i.d            | 7 days              | 250 mg<br>250 mg<br>× 7 = 1750 mg                 | 70 ml                              | Quantity is exactly equivalent to available pack size i.e. 70 ml                                    | Appropriate   |
|                                                                                                |                            | Suspension  | 125 mg /5 ml            | 250 mg /5 ml | b.i.d            | 7 days              | 250 mg<br>250 mg<br>× 7 = 1750 mg                 | 35 ml                              | 35 ml extra in available pack size of suspension i.e. 70 ml                                         | Inappropriate |
|                                                                                                |                            | IV infusion | 7.5 mg/kg (90–142.5 mg) | 500 mg       | b.i.d            | 2-5 days            | 180–285 mg<br>180–285 mg<br>× (2–5) = 360–1425 mg | 4–10 vials                         | 410–357.5 mg extra per dose.<br>820–715 mg extra per day.<br>1430–4100 mg extra for whole duration. | Inappropriate |
| Otitis media                                                                                   |                            | Suspension  | 125 mg                  | 125 mg /5 ml | b.i.d            | 5 days              | 250 mg<br>250 mg<br>× 5 = 1250 mg                 | 50 ml                              | Quantity is exactly equivalent to available pack size i.e. 50 ml                                    | Appropriate   |
|                                                                                                |                            | Suspension  | 125 mg                  | 250 mg /5 ml | b.i.d            | 5 days              | 250 mg<br>250 mg<br>× 5 = 1250 mg                 | 25 ml                              | 45 ml extra in pack size of suspension i.e. 70 ml                                                   | Inappropriate |

**b.i.d:** Two times a day, **IV:** Intravenous

| Infections                                    | Age (weight)               | Dosage form | Dose                    | Strength     | Dosing frequency | Duration of therapy | Dose/day & Dose/day × No. of days                    | Quantity of dosage form to be used | Calculation                                                                                                                                                                                          | Result        |
|-----------------------------------------------|----------------------------|-------------|-------------------------|--------------|------------------|---------------------|------------------------------------------------------|------------------------------------|------------------------------------------------------------------------------------------------------------------------------------------------------------------------------------------------------|---------------|
| Throat infections                             | 2 to 4 years (12 to 19 kg) | Suspension  | 125 mg                  | 125 mg /5 ml | b.i.d            | 10 days             | 250 mg<br>250 mg<br>× 10 = 2500 mg                   | 100 ml                             | Quantity is exactly equivalent to available pack size i.e. 2 x 50 ml                                                                                                                                 | Appropriate   |
|                                               |                            |             |                         |              |                  |                     |                                                      |                                    | 30 ml less in maximum available pack size of suspension i.e. 70 ml                                                                                                                                   | Inappropriate |
|                                               |                            | Suspension  | 125 mg                  | 250 mg /5 ml | b.i.d            | 10 days             | 250 mg<br>250 mg<br>× 10 = 2500 mg                   | 50 ml                              | 20 ml extra in available pack size of suspension i.e. 70 ml                                                                                                                                          | Inappropriate |
| Lyme disease, Helicobacter pylori eradication |                            | Suspension  | 7.5 mg/kg (90–142.5 mg) | 125 mg /5 ml | b.i.d            | 14–21 days          | 180–285 mg<br>180–285 mg<br>× (14–21) = 2520–5985 mg | 100.8-239.4 ml                     | 19.2 ml extra in suitable available packs of 1x50 ml and 1 x 70 ml for lowest quantity required. For highest quantity required, 0.6 ml extra in suitable available packs of 3 x 70 ml and 1 x 30 ml. | Inappropriate |

**b.i.d:** Two times a day, **IV:** Intravenous

| Infections                                    | Age (weight)               | Dosage form | Dose                    | Strength     | Dosing frequency | Duration of therapy | Dose/day & Dose/day × No. of days                 | Quantity of dosage form to be used | Calculation                                                                                                                                                        | Result        |
|-----------------------------------------------|----------------------------|-------------|-------------------------|--------------|------------------|---------------------|---------------------------------------------------|------------------------------------|--------------------------------------------------------------------------------------------------------------------------------------------------------------------|---------------|
| Lyme disease, Helicobacter pylori eradication | 2 to 4 years (12 to 19 kg) | Suspension  | 7.5 mg/kg (90-142.5 mg) | 250 mg /5 ml | b.i.d            | 14-21 days          | 180–285 mg<br>180–285 mg × (14–21) = 2520–5985 mg | 50.4– 119.7 ml                     | 19.6 ml extra in available packs size i.e., 70 ml for lowest quantity required. for highest quantity required, 20.3 ml extra in available pack size i.e. 2 x 70 ml | Inappropriate |

**b.i.d:** Two times a day

### Clarithromycin dosage and its calculations for 4 to 8 years children

| Infections                                                                                     | Age (weight)               | Dosage form | Dose                       | Strength     | Dosing frequency | Duration of therapy | Dose/day &Dose/day × No. of days                                                              | Quantity of dosage form to be used | Calculation                                                                                         | Result        |
|------------------------------------------------------------------------------------------------|----------------------------|-------------|----------------------------|--------------|------------------|---------------------|-----------------------------------------------------------------------------------------------|------------------------------------|-----------------------------------------------------------------------------------------------------|---------------|
| Pneumonia, sinusitis, mild to moderate skin and soft tissue infection, prevention of pertussis | 4 to 8 years (20 to 29 kg) | Suspension  | 187.5 mg                   | 125 mg /5 ml | b.i.d            | 7 days              | 375 mg<br>$375 \text{ mg} \times 7 = 2625 \text{ mg}$                                         | 105 ml                             | 15 ml extra in suitable available packs of 1x50 ml and 1x70 ml.                                     | Inappropriate |
|                                                                                                |                            | Suspension  | 187.5 mg                   | 250 mg /5 ml | b.i.d            | 7 days              | 375 mg<br>$375 \text{ mg} \times 7 = 2625 \text{ mg}$                                         | 52.5 ml                            | 17.8 ml extra in available pack size of suspension i.e. 70 ml.                                      | Inappropriate |
|                                                                                                |                            | IV Infusion | 7.5 mg / kg (150–217.5 mg) | 500 mg       | b.i.d            | 2–5 days            | 300–435 mg<br>$300\text{--}435 \text{ mg} \times (2\text{--}5) = 600\text{--}2175 \text{ mg}$ | 300-1087.5 ml 10 vials             | 350–282.5 mg extra per dose.<br>700–565 mg extra per day.<br>1130–3500 mg extra for whole duration. | Inappropriate |
| Otitis media                                                                                   |                            | Suspension  | 187.5 mg                   | 125 mg /5 ml | b.i.d            | 5 days              | 375 mg<br>$375 \text{ mg} \times 5 = 1875 \text{ mg}$                                         | 75 ml                              | 5 ml less in maximum available pack size of suspension i.e. 70 ml.                                  | Inappropriate |
|                                                                                                |                            | Suspension  | 187.5 mg                   | 250 mg /5 ml | b.i.d            | 5 days              | 375 mg<br>$375 \text{ mg} \times 5 = 1875 \text{ mg}$                                         | 37.5 ml                            | 32.5 ml extra in available pack size of suspension i.e. 70 ml.                                      | Inappropriate |

**b.i.d:** Two times a day, **IV:** Intravenous

| Infections        | Age (weight)               | Dosage form | Dose     | Strength     | Dosing frequency | Duration of therapy | Dose/day & Dose/day × No. of days  | Quantity of dosage form to be used | Calculation                                                                                             | Result        |
|-------------------|----------------------------|-------------|----------|--------------|------------------|---------------------|------------------------------------|------------------------------------|---------------------------------------------------------------------------------------------------------|---------------|
| Throat infections | 4 to 8 years (20 to 29 kg) | Suspension  | 187.5 mg | 125 mg /5 ml | b.i.d            | 10 days             | 375 mg<br>375 mg<br>× 10 = 3750 mg | 150 ml                             | 80 ml less in maximum available pack size of suspension i.e. 70 ml.                                     | Inappropriate |
|                   |                            |             |          |              |                  |                     |                                    |                                    | Quantity is exactly equivalent (i.e. 150 ml) if dispensed with 3 packs i.e. 1x70 ml, 1x50 ml and 1 x30. | Appropriate   |
|                   |                            | Suspension  | 187.5 mg | 250 mg /5 ml | b.i.d            | 10 days             | 375 mg<br>375 mg<br>× 10 = 3750 mg | 75 ml                              | 5 ml extra in available pack size of suspension i.e. 70 ml.                                             | Inappropriate |

**b.i.d:** Two times a day

| Infections                                    | Age (weight)               | Dosage form | Dose                       | Strength      | Dosing frequency | Duration of therapy | Dose/day & Dose/day × No. of days                 | Quantity of dosage form to be used | Calculation                                                                                                                                                                                                                                                                                                                                                                       | Result        |
|-----------------------------------------------|----------------------------|-------------|----------------------------|---------------|------------------|---------------------|---------------------------------------------------|------------------------------------|-----------------------------------------------------------------------------------------------------------------------------------------------------------------------------------------------------------------------------------------------------------------------------------------------------------------------------------------------------------------------------------|---------------|
| Lyme disease, Helicobacter pylori eradication | 4 to 8 years (20 to 29 kg) | Suspension  | 7.5 mg / kg (150–217.5 mg) | 125 mg / 5 ml | b.i.d            | 14–21 days          | 300–435 mg<br>300–435 mg × (14–21) = 4200–9135 mg | 168–365.4 ml                       | 8 ml less in 1x70 ml, 1x60 ml and 1 x30 pack sizes and 28 ml extra in 2 maximum pack sizes of suspension i.e. 2 x 70 ml for lowest quantity required. for highest required quantity, 5.4 ml less in 4x70 ml, 1x50 ml and 1 x30 pack sizes and 4.4 ml extra in 4x70 ml, 1x60 ml and 1 x30 pack sizes and 54.6 ml extra in 6 maximum available pack sizes of suspension i.e. 70 ml. | Inappropriate |

**b.i.d:** Two times a day

| Infections                                           | Age (weight)               | Dosage form | Dose                     | Strength     | Dosing frequency | Duration of therapy | Dose/day & Dose/day × No. of days                    | Quantity of dosage form to be used | Calculation                                                                                                                                                                                                                                                                                                                                                        | Result        |
|------------------------------------------------------|----------------------------|-------------|--------------------------|--------------|------------------|---------------------|------------------------------------------------------|------------------------------------|--------------------------------------------------------------------------------------------------------------------------------------------------------------------------------------------------------------------------------------------------------------------------------------------------------------------------------------------------------------------|---------------|
| Lyme disease, <i>Helicobacter pylori</i> eradication | 4 to 8 years (20 to 29 kg) | Suspension  | 7.5 mg/kg (150–217.5 mg) | 250 mg /5 ml | b.i.d            | 14–21 days          | 300–435 mg<br>300–435 mg × (14–21) =<br>4200–9135 mg | 84–182.7 ml                        | 14 ml less in available pack sizes of suspension i.e. 70 ml and 56 ml extra in 2 x70 ml pack sizes for lowest quantity required. for highest quantity required, 27.3 ml extra in 3 maximum available pack sizes of suspension i.e. 70 ml required quantity. for highest required quantity, 18 ml extra in 4 maximum available pack sizes of suspension i.e. 70 ml. | Inappropriate |

**b.i.d:** Two times a day



### Clarithromycin dosage and its calculations for 8 to 12 years children

| Infections                                                                                     | Age (weight)                | Dosage form | Dose                   | Strength     | Dosing frequency | Duration of therapy | Dose/day &Dose/day × No. of days                  | Quantity of dosage form to be used | Calculation                                                                                      | Result        |
|------------------------------------------------------------------------------------------------|-----------------------------|-------------|------------------------|--------------|------------------|---------------------|---------------------------------------------------|------------------------------------|--------------------------------------------------------------------------------------------------|---------------|
| Pneumonia, sinusitis, mild to moderate skin and soft tissue infection, prevention of pertussis | 8 to 12 years (30 to 40 kg) | Suspension  | 250 mg                 | 125 mg /5 ml | b.i.d            | 7 days              | 500 mg<br>500 mg<br>× 7 = 3500 mg                 | 140 ml                             | Quantity is exactly equivalent to available pack size i.e. 2x70 ml.                              | Appropriate   |
|                                                                                                |                             | Suspension  | 250 mg                 | 250 mg /5 ml | b.i.d            | 7 days              | 500 mg<br>500 mg<br>× 7 = 3500 mg                 | 70 ml                              | Quantity is exactly equivalent to available pack size i.e. 70 ml.                                | Appropriate   |
|                                                                                                |                             | IV infusion | 7.5 mg/kg (225–300 mg) | 500 mg       | b.i.d            | 2–5 days            | 450–600 mg<br>450–600 mg × (2–5) =<br>900–3000 mg | 4–10 vials                         | 275–200 mg extra per dose.<br>550–400 mg extra per day.<br>800–2750 mg extra for whole duration. | Inappropriate |
| Otitis media                                                                                   |                             | Suspension  | 250 mg                 | 125 mg /5 ml | b.i.d            | 5 days              | 500 mg<br>500 mg<br>× 5 = 2500 mg                 | 100 ml                             | Quantity is exactly equivalent available as 1x30 ml. and 1x70 ml                                 | Appropriate   |
|                                                                                                |                             | Suspension  | 250 mg                 | 250 mg /5 ml | b.i.d            | 5 days              | 500 mg<br>500 mg<br>× 5 = 2500 mg                 | 50 ml                              | 20 ml extra in available pack size of suspension i.e. 70 ml                                      | Inappropriate |

**b.i.d:** Two times a day, **IV:** Intravenous

| Infections                                    | Age (weight)                | Dosage form | Dose                   | Strength     | Dosing frequency | Duration of therapy | Dose/day & Dose/day × No. of days                        | Quantity of dosage form to be used | Calculation                                                                                                                                                                                                                                                                               | Result        |
|-----------------------------------------------|-----------------------------|-------------|------------------------|--------------|------------------|---------------------|----------------------------------------------------------|------------------------------------|-------------------------------------------------------------------------------------------------------------------------------------------------------------------------------------------------------------------------------------------------------------------------------------------|---------------|
| Throat infections                             | 8 to 12 years (30 to 40 kg) | Suspension  | 250 mg                 | 125 mg /5 ml | b.i.d            | 10 days             | 500 mg<br>500 mg<br>× 5 = 5000 mg                        | 200 ml                             | Quantity is exactly equivalent available as 2x70 ml and 1x60 ml                                                                                                                                                                                                                           | Appropriate   |
|                                               |                             |             |                        |              |                  |                     |                                                          |                                    | 10 ml extra for pack size of 3x70 ml.                                                                                                                                                                                                                                                     | Inappropriate |
|                                               |                             | Suspension  | 250 mg                 | 250 mg /5 ml | b.i.d            | 10 days             | 500 mg<br>500 mg<br>× 5 = 5000 mg                        | 100 ml                             | 30 ml less in available pack size of suspension i.e. 70 ml.<br>40 ml extra in available pack size of 2x70 ml.                                                                                                                                                                             | Inappropriate |
| Lyme disease, Helicobacter pylori eradication |                             | Suspension  | 7.5 mg/kg (225-300 mg) | 125 mg /5 ml | b.i.d            | 14–21 days          | 450–600 mg<br>450–600 mg<br>× (14–21) =<br>6300–12600 mg | 252–504 ml                         | 2 ml less in available pack sizes of 2x70 ml, 1x60 ml and 1x50 ml and 8 ml extra in available pack sizes of suspension i.e. 3x70 ml and 1x50 for lowest quantity required.<br>for highest quantity required, 6 ml extra in available pack sizes of suspension i.e. 8 x 60 ml and 1x30 ml. | Inappropriate |

**b.i.d:** Two times a day

### Clarithromycin dosage and its calculations for 12 to 18 years children

| Infections                                                                                     | Age (weight)   | Dosage form | Dose   | Strength       | Dosing frequency | Duration of therapy | Dose/day &Dose/day × No. of days  | Quantity of dosage form to be used | Calculation                                                              | Result        |
|------------------------------------------------------------------------------------------------|----------------|-------------|--------|----------------|------------------|---------------------|-----------------------------------|------------------------------------|--------------------------------------------------------------------------|---------------|
| Pneumonia, sinusitis, mild to moderate skin and soft tissue infection, prevention of pertussis | 12 to 18 years | Suspension  | 250 mg | 125 mg /5 ml   | b.i.d            | 7 days              | 500 mg<br>500<br>× 7 = 3500 mg    | 140 ml                             | Quantity is exactly equivalent to available pack size i.e. 2x70 ml.      | Appropriate   |
|                                                                                                |                | Suspension  | 250 mg | 250 mg /5 ml   | b.i.d            | 7 days              | 500 mg<br>500<br>× 7 = 3500 mg    | 70 ml                              | Quantity is exactly equivalent to available pack size i.e. 70 ml.        | Appropriate   |
|                                                                                                |                | Tablet      | 250 mg | 250 mg per tab | b.i.d            | 7 days              | 500 mg<br>500<br>× 7 = 3500 mg    | 14 tabs                            | 6 tablets extra in 2 pack sizes.<br>(1 pack size = 10 tabs)              | Inappropriate |
| Otitis media                                                                                   |                | Suspension  | 250 mg | 125 mg /5 ml   | b.i.d            | 5 days              | 500 mg<br>500 mg<br>× 5 = 2500 mg | 100 ml                             | Quantity is exactly equivalent in pack sizes of 1x70 ml and 1x30 ml.     | Appropriate   |
|                                                                                                |                | Suspension  | 250 mg | 250 mg /5 ml   | b.i.d            | 5 days              | 500 mg<br>500 mg<br>× 5 = 2500 mg | 50 ml                              | 20 ml extra in available pack size of suspension i.e. 70 ml.             | Inappropriate |
|                                                                                                |                | Tablet      | 250 mg | 250 mg per tab | b.i.d            | 5 days              | 500 mg<br>500 mg<br>× 5 = 2500 mg | 10 tabs                            | Quantity equivalent to available pack size of tablets (1 pack = 10 tabs) | Appropriate   |

**b.i.d:** Two times a day

| Infections                                    | Age (weight)   | Dosage form | Dose   | Strength       | Dosing frequency | Duration of therapy | Dose/day & Dose/day × No. of days | Quantity of dosage form to be used | Calculation                                                                                                                                                                                                                                                 | Result        |
|-----------------------------------------------|----------------|-------------|--------|----------------|------------------|---------------------|-----------------------------------|------------------------------------|-------------------------------------------------------------------------------------------------------------------------------------------------------------------------------------------------------------------------------------------------------------|---------------|
| Throat infections                             | 12 to 18 years | Suspension  | 250 mg | 125 mg /5 ml   | b.i.d            | 10 days             | 500 mg<br>500 mg<br>× 5 = 5000 mg | 200 ml                             | 10 ml extra in available pack size of 3x70 ml.                                                                                                                                                                                                              | Inappropriate |
|                                               |                | Suspension  | 250 mg | 250 mg /5 ml   | b.i.d            | 10 days             | 500 mg<br>500 mg<br>× 5 = 5000 mg | 100 ml                             | Quantity is exactly equivalent in pack sizes of 1x30 ml and 1x70 ml.                                                                                                                                                                                        | Appropriate   |
|                                               |                | Tablet      | 250 mg | 250 mg per tab | b.i.d            | 10 days             | 500 mg<br>500 mg<br>× 5 = 5000 mg | 20 tabs                            | Quantity equivalent to 2 available pack size of tablets.<br>(1 pack size = 10 tabs)                                                                                                                                                                         | Appropriate   |
| Lyme disease, Helicobacter pylori eradication |                | Tablet      | 500 mg | 500 mg per tab | b.i.d            | 14-21 days          | 500 mg<br>500 mg<br>× 2 = 1000 mg | 28-42 tabs                         | 2 tablets extra in 3 available pack sizes i.e. 10 ml for lowest quantity required.<br>For highest required quantity, 2 tablets less in 4 available pack size i.e. 10 ml and 8 tablets extra in 5 available pack size i.e. 10 ml.<br>(1 pack size = 10 tabs) | Inappropriate |

**b.i.d:** Two times a day
